# Supplementary material for: Common Variants at 10 Genomic Loci Influence Hemoglobin A1C Levels via Glycemic and Nonglycemic Pathways
Source: Oxford University Press journal article supplement (doi:10.2337/db10-0502), 2010-09-21
Supplement: db100502onlineappendix2.xls [file db100502onlineappendix2.xls]

## Sheet: Convert info
	Males					Females
	N	Min	Max	Mean	SD	N	Min	Max	Mean	SD
Age	1217	44.5	46	45.31	0.34	1284	44.5	46	45.2	0.33
Height	1217	155	198.8	176.2	6.57	1284	140	184.5	162.95	6.2
Weight	1217	50.8	177.1	86.81	14.32	1284	43	155.3	71.33	15.2
BMI	1217	16.84	51.63	27.93	4.12	1284	17.18	52.21	26.86	5.5
HbA1c	1217	3.22	11.32	5.18	0.48	1284	3.24	11.12	5.22	0.51
	N	Age (years)	Height (cm)	Weight (Kg)	BMI (kg/m2)	HbA1C (%, NGSP)
Males/Females	1217 / 1284	45.31 (0.34) / 45.2 (0.33)	176.2 (6.57) / 162.95 (6.2)	86.81 (14.32) / 71.33 (15.2)	27.93 (4.12) / 26.86 (5.5)	5.18 (0.48) / 5.22 (0.51)
	181 / 550
	53.09 (5.55) / 49.29 (8.69)
	173.07 (6.41) / 160.14 (5.80)
	69.44 (6.47) / 54.76 (5.83)
	23.14 (1.17) / 21.33 (1.85)
	5.25 (0.38) / 5.16 (0.38)
	181 / 550	53.09 (5.55) / 49.29 (8.69)	173.07 (6.41) / 160.14 (5.80)	69.44 (6.47) / 54.76 (5.83)	23.14 (1.17) / 21.33 (1.85)	5.25 (0.38) / 5.16 (0.38)
N
Age (years)
Height (cm)
Weight (Kg)
BMI (kg/m2)
HbA1C (%, NGSP)

## Sheet: Table S1
Table S1. Genotyping QC metrics for studies included in the meta-analysis
	COHORT	B58C-WTCCC	BLSA	DGI	EPIC_cases	EPIC_cohort	Fenland	FHS	KORA F3	Lolipop	SardiNIA	B58C-T1DGC	ARIC	CROAS (Vis Study)	deCODE	DESIR	GenomeEUtwin	HEALTH2000	KORA S4/F4	NTR	ORCADES	PROCARDIS	SHIP	Sorbs	DIAGEN	Epic 5000	METSIM	LURIC	Partners/Roche	SardiNIA stage 2	NHANES III	Segovia
COHORT INFORMATION	Ethnicity	European descent	European descent	European descent	European descent	European descent	European descent	European descent	European descent	European descent	European descent	European descent	Self Reported US whites	European descent	European descent	European descent	European descendent	Finnish	European descent	European descent	European descent	European descent	European descent	European descent	European descent	European descent	European descent	European descent	European descent	European descendent	European descent	European descendent
	Country	UK	USA	Finland, Sweden	UK	UK	UK	USA	Germany	UK	Italy	UK	United States	Croatia	Iceland	France	The Netherlands, united Kingdom, Sweden	Finland	Germany	Netherlands	Scotland	UK, Sweden, Italy, Germany	Germany (West Pomerania)	Germany	Germany	UK	Finland	Germany	USA	Italy	USA	Spain
	Collection type	Population-based	Population-based	Case-control	Population-based	Population-based	Population-based	Population-based	Population-based	Population-based	Population-based	Population-based	prospective cohort	Population-based	Population-based	Population-based	Population-based	Case-contol study, subset of a population-based cohort. Only controls in this study	Population-based	Population-based	Population-based	Case-control	Population-based	Population-based	Population-based	Population-based	Population-based	Individuals from coronary angiogram study that were free of disease	Case-Control	Population-based	Population-based	Population -based
HbA1C measurements	Sample	Citrated whole blood (non-fasting)	Whole blood (fasting)	Fasting blood	non-fasting whole blood (EDTA)	non-fasting whole blood (EDTA)	Fasting whole blood (EDTA)	Fasting blood	whole blood (non-fasting)	Fasting whole blood	Fasting blood	Citrated whole blood (non-fasting)	fasting blood	Fasting blood in EDTA	Whole blood (fasting)	Fasting blood	Fasting Blood	Fasting blood	whole blood (S4: non-fasting, F4: fasting)	Fasting blood	Fasting blood in EDTA	Fasting blood in EDTA	non-fasting whole blood (EDTA)	75g OGTT (fasting, 30 min, 120 min), EDTA blood	Whole blood in EDTA (fasting)	non-fasting whole blood (EDTA)	Fasting EDTA blood	Whole blood (fasting)	Fasting blood	Fasting blood	Fasting blood	Fasting blood
	Collection method	Not fasted	Overnight fast	12 hour overnight fast	Stored at 4-7 degrees prior to weekly transportation at ambient temperature. Sample spun prior to being assayed	Stored at 4-7 degrees prior to weekly transportation at ambient temperature. Sample spun prior to being assayed	Overnight fast, samples transported at ambient temperature and analysed the same day.	≥8 hr overnight fast	EDTA blood, samples stored at 4 - 6 degrees Celsius; transported at same temperature and analysed the same day.	≥8 hr fast	Overnight fast	Not fasted	≥8 hr overnight fast	Overnight fast blood samples immediatelly stored at -70C and then transported at -20C	Overnight fast	12h overnight fast	Overnight fast	Ovenight fast	EDTA blood, samples stored at 4 - 6 degrees Celsius; transported at same temperature and analysed the same day.	Venous, processed same day < 5 hours	Fast from 10pm prev night, blood drawn in EDTA tube, between 8-9.30 am, taken to biochem lab w / in 2h	Clinic	non-fasting	Overnight fast, spinning within 1 hour after collection, then immediate quick-freeze on dry ice before transport, further storage in -80°C freezer	10 hour minimum overnight fast	Stored at 4-7 degrees prior to weekly transportation at ambient temperature. Sample spun prior to being assayed	-	fasting	≥8 hr overnight fast	Overnight fast	≥8 hr overnight fast	≥10 hr overnight fast
	Assay	Ion-exchange HPLC by Tosoh A1c 2.2 Glycohemoglobin Analyser HLC-723GHb	Bio-Rad Laboratories, Hercules, CA, USA	Different assays were performed by center: Botnia - HPLC assay (Diamat,Hercules, CA,USA) Malmö - Variant II chromatographic method from Bio-Rad (CA,USA) Skara - Ion-exchange chromatography (HPLC, Jasco Inc, Easton, USA)	Clinical biochemistry, Addenbrookes hospital, HPLC analyser (BioRad Diamat)	Clinical biochemistry, Addenbrookes hospital, HPLC analyser (BioRad Diamat)	Clinical biochemistry, Addenbrookes hospital. HPLC Analyser: TOSOH G7 (Tosoh Bioscience Ltd, Worcestershire, UK)	Massachusetts General Hospital Diabetes Lab; HPLC after an overnight dialysis against normal saline; standardized against the glycosylated hemoglobin assay used in the Diabetes Control and Complications Trial; inter- and intra-assay CVs <2.5%.	turbidimetric immunologic inhibition assay (TINIA; HA1C Kit Dade Behring)	Menarini HA-8160	Bio-Rad Laboratories, Hercules, CA, USA	Ion-exchange HPLC by Tosoh A1c 2.2 Glycohemoglobin Analyser HLC-723GHb	Frozen whole blood samples collected at ARIC Visit 2 (1990-1992) were thawed and assayed for hemoglobin A1c (HbA1c) in 2003-04 using a high performance liquid chromatography instrument (the Tosoh 2.2 Plus HPLC instrument) and the remaining specimens in 2007-08 using the Tosoh G7 instrument.	cation exchange method, with immunochemistry electrophoresis and affinity linking compatible with DCCT/UK PDS standard. Salzer laboratory, Zagreb Croatia	measured on a Hitachi 912 using reagents from Roche Diagnostics	high-performance liquid chromatography, using a L9100 automated ion-exchange analyzer (Hitachi/Merck-VWR). This assay was standardized to the National Glycohemoglobin Standardization Program	Nycocard HbA1c, Axis-Shield, Oslo, Norway Swedish samples: The participants from all of Sweden were asked to make an appointment at their local health-care facility on Monday to Thursday mornings (not the day before a national holiday), to ensure that the samples would reach Karolinska in Stockholm by over-night mail. Blood was drawn by venipuncture. HbA1C was measured in whole blood by high perf…	Immunoturbidometrically using Architect ci8200-analyzer (Abbott Laboratories, Abbott Park, Illinois, U.S.A.)	S4: turbidimetric immunologic inhibition assay (TINA-quant Heomoglobin A1c II; Roche Diagnostics) ; F4: HPLC (Menarini HA-8160)	Nycocard HbA1c, Axis-Shield, Oslo, Norway	Balfour Hospital Laboratory, Kirkwall, Orkney. Beckman Synchron system. Colorimetric assay of haemoglobin in haemolysate. Turbidimetric immuno-inhibition assay of Haemoglbin A1c in haemolysate. Standardised against DCCT	Central Laboratory of the University Hospital, Münster, Germany:HbA1c was measured by HPLC on a Merck-Hitachi L-9100 automated HPLC system. Reference material was obtained from the national German INSTAND proficiency testing program. Inter- and intra-assay CVs were <2.5%.	HPLC micro column photometric measurement automatic calculation	HPLC (Bio-Rad) from EDTA blood Bio-Rad Variant II HbA1C analyzer VARIANT II™ HbA1c Program is totally-automated	HbA1c values were measured by high performance liquid chromatography (HPLC) (BioRad Diamat) or immuno-turbidimetry (ROCHE Tina-quant) in selected contracted laboratories certificated by external German control management institutes (INSTANT or DGKC). The HPLC served as the reference method recommending an upper reference value of 6.1%. compared to 6.0% for immuno-turbidimetry.	Clinical biochemistry, Addenbrookes hospital, HPLC analyser (BioRad Diamat)	HPLC (Laboratory: Kuopio University Hospital, ISLAB) Reagents: Tosoh G7 glycohemoglobin analyser, Tosoh Bioscience, Inc. San Francisco, CA, USA Instrumentation: Tosoh Bioscience, Inc. San Francisco, CA, USA Certified by NGSP. The calibration is traceable to DCCT	until 31-12-1999: Immunoassay; Haemoglobin A1c UNI-MATE 5; Hoffmann-La Roche AG, Grenzach-Whylen, Germany since 01-01-2000: HPLC; Diamat; Chromsystem Instruments & Chemicals GmbH, Martinsried, Germany	Massachusetts General Hospital Diabetes Lab; HPLC after an overnight dialysis against normal saline; standardized against the glycosylated hemoglobin assay used in the Diabetes Control and Complications Trial; inter- and intra-assay CVs <2.5%.	Bio-Rad Laboratories, Hercules, CA, USA	HPLC; standardized against the glycosylated hemoglobin assay used in the Diabetes Control and Complications Trial; inter- and intra-assay CVs <2.0%.	HPLC TosohR G8
	Reference (PMID)	Protocol accessible at http://www.b58cgene.sgul.ac.uk/hba1c_g5.pdf	346572	17463246	1280025	1280025	-	9518396	-	-	16934002	Protocol accessible at http://www.b58cgene.sgul.ac.uk/hba1c_g5.pdf	-	-	-	16801588	-	-	-	-	-	-	-	-	External quality control was performed two to four times per year and covered the ranges 5.1-6.5% (decisive for diabetes) and 8.1-10.8%. There were neither significant differences between the methods used nor between the declared values and the results obtained by different laboratories.	1280025	15285181	11258203	-	16934002	-	-
GENOTYPING	Type [de novo / in-silico]	in-silico	in-silico	in-silico	in-silico	in-silico	in-silico	in-silico	in-silico	in-silico	in-silico	in-silico	in-silico	in-silico	in-silico	in-silico	in-silico	in-silico	in-silico	in-silico	in-silico	in-silico	in-silico	in-silico	de novo	de-novo	de novo	de-novo	de novo	de-novo	de novo	de-novo
	Genotyping platform and SNP panel	Affymetrix 500K	Illumina550K	Affymetrix 500K SNP array	Affymetrix 500K Array Set	Affymetrix 500K Array Set	Affymetrix 500K Array Set	Affymetrix 500K and MIPS 50K	Affymetrix 500K Array Set	Affymetrix 500K Array Set	Affymetrix 500K Array Set	Illumina Human Hap 550	Affymetrix SNP 6.0	Illumina Hap300	Human Hap300 and Human Hap300-duo+ Bead Arrays, Illumina,	Illumina 100K, 300K, 370 duo	Illumina II 300K	Illumina HumanHap 610	Affymetrix 6.0	Perlegen 600K	Illumina Hap300, subset on CNV370, called with Hap300 files	Illumina Human1M	Affymetrix SNP 6.0 Array	500K Affymetrix GeneChip (250K Sty and 250K Nsp arrays, Affymetrix, Inc) and Affymetrix Genome-Wide Human SNP Array 6.0	iPLEX Sequenom MassARRAY	Sequenom iPLEX	iPLEX Sequenom MassARRAY	Sequenom iPLEX	Sequenom iPLEX	TaqMan SNP genotyping assay (Applied Biosystems)	Sequenom iPLEX	TaqMan SNP genotyping assay (Applied Biosystems)
	Genotyping centre	Affymetrix	NIA	Broad Institute, Cambridge, MA, USA	Affymetrix	Affymetrix	Affymetrix	Affymetrix	Genome Analysis Center (GAC) Helmholtz-Zentum München	Affymetrix	SardiNIA Research Laboratory, Lanusei, Italy	Illumina	Broad Institute	Edinburgh WTCCC	deCode Genetics	Genome Quebec Innovation Centre, Montreal, Canada CNRS-UMR8090, Lille, France	Finnish Genome Center in Helsinki & Uppsala University Sweden	Sanger Institue	Genome Analysis Center (GAC) Helmholtz-Zentum München	Perlegen / GAIN	Munich GSF	CNG Uppsala	Affymetrix	Microarray Core Facility of the Interdisciplinary Centre for Clinical Research, University of Leipzig, Germany and ATLAS Biolabs GmbH, Berlin, Germany	NHGRI	Wellcome Trust Sanger Institute, Cambridge, UK	NHGRI	Wellcome Trust Sanger Institute, Cambridge, UK	Broad Institute	SardiNIA Research Laboratory, Lanusei, Italy	Broad Institute	Diabetes and Lipids Research Laboratory
	Genotyping calling algorithm	CHIAMO	Beadstudio	-	BRLMM	BRLMM	BRLMM	BRLMM	BRLMM	BRLMM	BRLMM	Illuminus	birdseed	Beadstudio using Hap300v2 cluster file	Beadstudio	BeadStudio (v3.3.7 in Lille, v2.0 in Canada) calling by using the manufacturer’s default cluster settings	Beadstudio 2.0	Illuminus	Birdseed2	Perlegen's proprietary genotype calling algorithm	Beadstudio using Hap300v2 cluster file	Beadstudio	Birdseed V2	BRLMM algorithm (Affymetrix, Inc) for 500K and Birdseed Algorithm for Genome-Wide Human SNP Array 6.0	Sequenom MassArray Typer 3.4	Sequenom MassArray Typer 3.4	Sequenom MassArray Typer 3.4	Sequenom MassArray Typer 3.4	Sequenom	-	Sequenom	-
SAMPLE QC	Call rate [filter detail / N individuals excluded]	>=97%	>98.5 % / 9	>95% / none	0.94	0.94	95% / 1	97% / 102	-	0.9	>95% / none	>=98%	0.95/0	0.98	≥95% / 472	95%/15	0.95 / 28	0.95/7	-	99.2% / 8	0.98	0.95	0.92	>0.94	0.9	0.8	0.9	0.8	99.7% (96% / 14)	-	99.7% (96% / 14)	-
	Heterozygosity [filter detail / N individuals excluded]	<23% or >30%	-	-	<23% or >30%	<23% or >30%	Heterozygosity upperbound 0.28822 lowerbound 0.27348 / 87	5 SD from mean (< 25.758% or > 29.958%) / 16	-	-	-	NA	-	FDR<1%	-	-	-	-	-	-	FDR<1%	-	-	-	-	-	-	-	-	-	-	-
	Ethnic outliers / other exclusions	1) Ethnic outliers 2) External discordance with genotype or phenotype data 3) Related individuals (>86% concordance with another DNA) 4) Duplicate (>99% concordance with another DNA	Ethnic outliers; duplicates; gender mismatch	Parent-offspring combinations	Ethnic outliers; >5.0% discordance in SNP pairs with r2= 1 in HapMap; Related individuals (>70% concordance with another DNA) selected based on sample call rate); Duplicate (>99% concordance with another DNA)	Ethnic outliers; >5.0% discordance in SNP pairs with r2= 1 in HapMap; Related individuals (>70% concordance with another DNA) selected based on sample call rate); Duplicate (>99% concordance with another DNA)	Failed relatedness and duplicate check / 43	> 1000 Mendelian errors (1)	-	-	-	NA	Gender mismatch: X / Y checks / 32; Inferred 1st degree relatives / 83; Mismatch of 10 or more SNPs with SNPs previously genotyped on other platforms / 297; Genetic outlier as assessed by Identity by State (IBS) using PLINK and >8 SD along any of the first 10 principal components in EIGENSTRAT with 5 iterations / 331	Ethnic outliers; duplicates; gender mismatch; excess IBS incompatible with pedigree	-	-	-	Unspecified Sex: 1 individual; Related individuals PI_HAT>0.2: 13 individuals; Contamination: 3 individuals; MDS-plot outliers: 14 individuals; Excess Fst: 4 individuals	-	Contamination (< 0.74 IBS (1)); relatedness (IBS > 828 (38)); second or first degree relatives; gender mismatch (2)	Ethnic outliers; duplicates; gender mismatch; excess IBS incompatible with pedigree	Ethnic outliers	-	Ethnic outliers; duplicates; gender mismatch; IBS>0.2	-	-	-	-	-	-	-	-
	Individuals for analysis	1428	857	480	957	1911	1378	1996	1462	823	3346	2501	6777	720	6240	716	568	1205	1735	3122	719	830	3538	705	1000	3359	1789	441	1736	1445	1214	583
SNP QC (prior to imputation)	MAF [filter detail / N SNPs excluded]	≥ 1%	1% / 23,053	1% / 66,549	≥ 1%	≥ 1%	1% / 55,271	1% / 67,012	-	0.01	5% / 130,382	NA	MAF < 1%	0.01	0.01	-	< 1%	<0.02	-	1% / 41,526	0.01	0.05	-	0.01	0.01	≥ 1%	0.01	≥ 1% / 0	5% / -	1% / 1	5% / -	5%/-
	HWE [filter detail / N SNPs excluded]	P > 10-4	10-4 / 470	10-6 / 5,775	P > 10-6	P > 10-6	10-6 / 3,690	10-6 / 20,469	-	1e-06	10-6 / 7,842	NA	pHWE < 10-6	10-6	10-6 / 39,548	10-4/758	-	<0.0001	-	10-4 / 57,726	10-6	0.0016	-	10-4	0.001	P ≥ 0.001 / 1	0.001	P ≥ 0.001 / 0	-	0.001 / none	-	0.001/1
	Call rate [filter detail / N SNPs excluded]	≥ 95%	99% / 23,728	95% / 34,761	≥ 95%	≥ 95%	90% / 5,675	95% / 23,099	-	0.9	90% (3,975)	NA	call rate <95%	0.98	0.96	95%/16827	< 90%	call rate <95%	-	95% (MAF>0.05) or 99% (MAF < 0.05) / 161,149	0.98	0.95	-	0.95	0.9	≥ 90% / 1	0.9	≥ 90% / 0	-	90% /none	-
	Other	-	-	3605 SNPs that map to multiple locations	-	-	-	-	Individual Callrate: <93% each chip	-	Mendel errors > 2 / 2,010	Multi-allelic SNPs, SNPs with mismatch in alleles between dbSNP and Illumina	-	-	-	autosomal only	-	-	Individual Callrate: <93% each chip	Mendel errors > 2 / 536; Duplicate errors > 2 / 1143425052	-	-	-	-	-	-	-	-	-	Mendel errors/ none	-
	SNP number in QC'd dataset	419829	514278	389878	389074	389074	362059	378163	490032	349312	356359	539458	704588	275093	299319	300283	318237	598203	909622	427049	298785	882598	909622	378513	5	5	5	5	5	4	10	4
IMPUTATION STATS	Imputation software	IMPUTE	MACH	MACH	IMPUTE	IMPUTE	IMPUTE (v0.4.2)	MACH	MACH v1.0.9	IMPUTE	MACH	MACH	MMach1 v1.0.15	MACH1.0 ML	IMPUTE	Impute v0.5.0	Mach	MACH 1.0.10	Impute v0.4.2	IMPUTE	MACH1.0 ML	Impute	Impute (v0.5.0)	IMPUTE	-	-	-	-	-	-	-	-
	Imputation quality metrics	proper_info ≥ 0.40	r2hat > 0.3	r2hat > 0.3	proper-info ≥ 0.40	proper-info ≥ 0.40	proper-info ≥ 0.40	r2hat > 0.3	-	Proper-info > 0.4	r2hat > 0.3	r2hat ≥ 0.3	-	r2hat > 0.3	Proper-info > 0.4	proper-info > 0.4	-	-	-	-	r2hat > 0.3	Proper-info > 0.4	-	Proper-info > 0.4	-	-	-	-	-	-	-	-
	Other SNP QC filters applied?	MAF ≥ 1%	MAF ≥ 1%	MAF ≥ 1%	MAF ≥ 1%	MAF ≥ 1%	MAF ≥ 1%	MAF > 1%	-	MAF>1%, HWE<10-7	MAF > 1%	MAF ≥ 1%	-	-	MAF > 1%	-	-	-	-	-	-	MAF > 1%	-	MAF>1%, HWE<10-4	-	-	-	-	-	-	-	-
DATA ANALYSIS	Number of SNPs in analysis	2583150	2467876	2322084	2528277	2528277	2555899	2423345	2374873	2423479	2252228	2557253	2557232	2543887	2473715	2544187	2621874	2449205	2499815	2562566	2543887	2667162	2748910	2352557	5	5	5	5	5	4	10	4
	Trait transformation HbA1C	untransformed	untransformed	untransformed	untransformed	untransformed	untransformed	untransformed	untransformed	untransformed	untransformed	untransformed	untransformed	untransformed	untransformed	untransformed	untransformed	untransformed	untransformed	untransformed	untransformed	untransformed	untransformed	untransformed	untransformed	untransformed	untransformed	untransformed	untransformed	untrasformed	untransformed	untrasformed
	1	sex, date & time of collection, postal delay and nurse (which also adjusts for area of residence)	Age, sex, and PC	Age, gender, clinical center	Age, sex, healthcheck	Age, sex, healthcheck	Age, sex	Sex-specific residuals adjusted for age and age2	age, sex	age,sex, 2 principle components	age, sex , age squared; Modeled family relationships	sex, date & time of collection, postal delay and nurse (which also adjusts for area of residence)	age,sex,center	Age and sex	Age and sex	gender, age	age, sex, country	age, sex, sex^2	age, sex	Age, sex, cohort	Age and sex	Age and sex	age, sex, study center	Age and sex	Age, age2, sex	Age, sex, healthcheck	Age, age2	Age, sex	Age, sex	age, sex, age squared; Modeled family relationships	Age, Sex
	Analysis method	Linear regression	Linear regression	Linear regression	Linear regression	Linear regression	Linear regression	Linear mixed effect models	Linear regression	Linear regression	Score test (FastAssoc)	Linear regression	Max likelihood regression on dose	Max likelihood regression on dose	Linear regression	linear regression	linear regression	Linear regression	Linear regression	Linear regression	Max likelihood regression on dose	Linear regression	Linear regression	Linear regression	Linear regression	Linear regression	Linear regression	Linear regression	GLM	Score test (FastAssoc)	GLM	Linear regression
	Software for analysis	SNPTEST	MERLIN offline	PLINK	SNPtest	SNPtest	SNPtest	LMEKIN (R package)	MACH2QTL v1.0.4	QUICKTEST (v0.94)	MERLIN	ProbABEL	ProbABEL	ProbABEL	R / SNPTEST	Snptest v1.1.4	Plink	PLINK	SNPTEST v1.1.5	SNPTEST	ProbABEL	Stata	QUICKTEST (v0.94)	SNPTEST	MERLIN	STATA (v. 9.2)	MERLIN	PLINK	SAS 9.1.9	MERLIN	SAS 9.1.3	SPSS 15
	Genomic Control Lambda	0.976	1	1.25	0.998	1.014	1.009	1.037	0.982	1.009	1.133	0.998	1.025	1.015	1.02	1.02	1.009	0.997	0.986	1.018	1.079	0.997	1.026	1.116	-	-	-	-	-	-	-	-
REFERENCES	Reference cohort (PMID)	PMID:17255346	ED292030	17463246	10466767	10466767	-	-	16032514	-	16934002	PMID:17255346	-	-	19079260	8927780	-	-	16032514	18197199	-	-	11565448	19729412	16801592	17488802	19223598	11258203	-	18514160	15380800
	Reference GWAS (PMID)	PMID:17554300	-	17463246	-	-	-	-	19503597	-	10834415	PMID: 17130525	-	18327257	19079260	17293876	-	-	19503597	18197199	-	-	-	-	-	-	-	-	-	-	-	-
	Website	http://www.b58cgene.sgul.ac.uk/	http://www.grc.nia.nih.gov/branches/blsa/blsa.htm	http://www.broad.mit.edu/diabetes	http://www.srl.cam.ac.uk/epic/	http://www.srl.cam.ac.uk/epic/	http://www.mrc-epid.cam.ac.uk/Studies/Fenland/	http://www.ncbi.nlm.nih.gov/projects/gap/cgi-bin/study.cgi?study_id=phs000007.v5.p3	http://epi.helmholtz-muenchen.de/kora-gen/index_e.php	-	http://sardinia.nia.nih.gov/	http://www.b58cgene.sgul.ac.uk/	http://www.cscc.unc.edu/aric/index.php	-	http://www.decode.is	-	http://www.genomeutwin.org/	http://www.terveys2000.fi/indexe.html	http://epi.helmholtz-muenchen.de/kora-gen/index_e.php	http://www.tweelingenregister.org/	-	http://www.procardis.org	http://ship.community-medicine.de	-	-	http://www.srl.cam.ac.uk/epic/	-	www.luric.de	-	http://sardinia.nia.nih.gov/	http://www.cdc.gov/nchs/products/elec_prods/subject/nhanes3.htm

## Sheet: Table S2
Table S2. Associations with HbA1C of ten Independent loci in individual cohorts
SNP	Nearest gene	Effect/Other	Cohort	1958BC	BLSA	DGI	EPIC cases	EPIC cohort	Fenland	FHS	KORA F3	Lolipop	SardiNIA	1958BC-T1DGC	ARIC	Croatia	deCODE	DESIR	GenomeEUtwin	H2000	KORA S4	NTR	ORCADES	PROCARDIS	SHIP	Sorbs	DIAGEN	Epic 5000	LURIC	NHANES III	METSIM	Roche/Partners	SardiNIA stage 2	Segovia
rs2779116	SPTA1	T/C	N	1428	490	480	1448	2079	1378	1996	1462	770	3346	2501	6777	669	342	705	568	-	1741	1452	671	831	3538	675	-	-	-	-	-	-	-
			FREQ	0.266457	0.253	0.305208	0.254489	0.256854	0.27395	0.28696	0.246655	0.258442	0.361	0.2869	0.2638	0.22148	0.2523	0.284397	0.2746	-	0.233487	0.247782	0.217901	0.267677	0.245558	0.235308	-	-	-	-	-	-	-
			Beta	0.0218508	-0.024	0.108	0.0371771	0.0255056	0.0219186	0.0142287	0.035	0.0278705	-0.005	0.0110305	0.0289728	0.0230385	-0.0332	0.0441299	0.02462	-	-0.00102404	0.00544092	-0.00735474	-0.0150482	0.0452894	0.0551747	-	-	-	-	-	-	-
			SE	0.0261569	0.035	0.06921	0.0398655	0.019865	0.0151781	0.02088	0.014	0.0293554	0.016	0.0155877	0.00703635	0.0306495	0.0967	0.0203349	0.04585	-	0.0178301	0.0191834	0.0318815	0.0481559	0.0144042	0.0231503	-	-	-	-	-	-	-
			P-value	0.403771	0.4851	0.1623	0.351238	0.199172	0.148676	0.495526	0.01409	0.342444	0.7927	0.479015	3.82856e-05	0.452246	0.73	0.031534	0.5915	-	0.953995	0.7767	0.817556	0.752995	0.0016655	0.0171253	-	-	-	-	-	-	-
			Imputation quality	0.998361	0.9987	0.997	0.997984	0.995408	0.996698	1.00419	0.9982	0.988685	1.005	0.9973	0.9993	0.998582	0.9984	0.989875	0.99541	-	0.993674	0.971429	0.999054	0.999987	0.995664	0.999306	-	-	-	-	-	-	-
rs552976	G6PC2/ABCB11	G/A	N	1428	490	480	1461	2088	1377	1996	1462	770	3346	2501	6777	669	342	708	568	1205	1729	1452	671	831	3538	675	929	-	382	1205	1550	-	1445	579
			FREQ	0.651961	0.663	0.615625	0.645448	0.645594	0.627814	0.651817	0.655414	0.652597	0.531	0.6589	0.6529	0.599674	G	0.612994	0.632	0.6494	0.639965	0.632419	0.605072	0.652393	0.641221	0.628369	0.336	-	0.6492	0.665975	0.695	-	0.51326	0.34
			Beta	0.0572559	0.047	0.02863	0.056253	0.0223542	0.0208	0.046002	-0.0017533	0.0550105	0.048	0.0314143	0.0351593	-0.0181107	0.0956	0.0274658	0.02784	0.03123	-0.00280826	0.033279	0.033791	0.0037378	0.024344	0.0074747	0.033	-	0.0519	0.0434237	0.038	-	0.02	0.07
			SE	0.0234238	0.032	0.06609	0.0376425	0.0182237	0.0137632	0.019947	0.0130152	0.0258921	0.016	0.0148609	0.00654749	0.0257141	0.0876	0.0193304	0.04057	0.01227	0.0158435	0.0172233	0.0275113	0.0474561	0.013072	0.0206175	0.029	-	0.04425	0.0176488	0.012	-	0.032	0.029
			P-value	0.0141836	0.1394	0.6989	0.135072	0.219951	0.13072	0.0210958	0.892856	0.0336196	0.004094	0.0345332	7.87848e-08	0.48124	0.29	0.159396	0.4929	0.01102	0.859312	0.0533342	0.21935	0.936425	0.0625606	0.716949	0.2568	-	0.2416	0.014017	0.001578	-	0.5463	0.017
			Imputation quality	G	0.9975	G	G	G	G	1	G	1	G	G	G	0.998797	0.9926	0.997853	0.994574	G	G	0.980957	0.997144	G	G	1	G	-	G	G	G	-	G	G
rs1800562	HFE	G/A	N	1428	490	478	1456	2077	1378	1990	1462	-	3346	2501	6777	669	342	716	568	1205	1729	1452	671	831	3538	675	947	3162	410	1213	1729	639	1445	583
			FREQ	0.919818	0.944	0.959205	0.941621	0.939095	0.947025	0.9419	0.951034	-	0.981	0.9188	0.9361	0.977332	G	0.944134	0.95599	0.97469	0.95373	0.936582	0.943232	0.928049	0.959287	0.95461	0.957	0.935168	0.96341	0.932399	0.971	0.941315	0.995	0.015
			Beta	-0.0010341	0.079	0.2582	0.103021	0.0882511	0.0779913	0.131421	0.0817033	-	0.096	0.0742342	0.0531085	-0.0039224	-0.125	0.0635513	0.03714	0.05343	0.068577	0.0390069	0.0848689	-0.0890034	0.033408	0.16059	0.07	0.0700847	0.2259	0.0382661	0.074	0.007937	-0.06	0.2
			SE	0.0438492	0.061	0.1625	0.0745772	0.0357652	0.03035	0.0418423	0.0294071	-	0.051	0.0255044	0.0132541	0.0841799	0.1793	0.040483	0.09803	0.03791	0.0345491	0.0346239	0.0581527	0.0882219	0.0301096	0.0465834	0.068	0.0270285	0.1085	0.0331535	0.032	0.05189	0.235	0.112
			P-value	0.960517	0.1919	0.1564	0.167157	0.0136056	0.0101778	0.0016845	0.0055335	-	0.07434	0.00362191	6.1508e-05	0.962837	0.5	0.119902	0.7049	0.159	0.0471543	0.259916	0.144451	0.30964	0.267193	0.0005661	0.3039	0.00955832	0.03786	0.248642	0.01926	0.87848	0.8	0.075
			Imputation quality	G	0.9904	G	G	G	G	1	G	-	0.337	G	G	0.999464	1	G	0.998062	G	G	1	0.99975	G	G	1	G	G	G	G	G	G	G	G
rs1799884	GCK	T/C	N	1428	490	480	1443	2061	1378	1996	1460	770	3346	2501	6777	669	342	715	568	1205	1745	1452	671	831	3538	675	942	3339	410	1214	1737	647	1445
			FREQ	0.183123	0.172	0.115625	0.168053	0.172004	0.177794	0.179689	0.188794	0.17013	0.171	0.1849	0.1747	0.145357	0.1547	0.16993	0.1822	0.1203	0.163324	0.182192	0.229754	0.169182	0.158201	0.0723404	0.84	0.174603	0.1585	0.181631	0.099	0.193972	0.171
			Beta	0.0625883	-0.043	0.1136	0.0685533	0.083796	0.0329916	0.0139417	0.0343843	0.0511054	0.051	0.0687842	0.050211	0.0133515	0.0375	0.0247111	0.03329	0.03068	0.0312615	0.00976193	-0.0454746	-0.0554434	0.0467327	0.0741671	-0.04	0.0378037	0.08402	0.0377217	0.018	0.0338279	0.013
			SE	0.0291429	0.039	0.1013	0.0478798	0.0231669	0.0176543	0.0252137	0.0160191	0.0337638	0.02	0.0178144	0.00845058	0.0358555	0.1144	0.0248318	0.0526	0.01802	0.0202714	0.0214799	0.0321516	0.0557256	0.0168858	0.0400608	0.038	0.0167766	0.05542	0.0211004	0.018	0.0302052	0.043
			P-value	0.0318122	0.2637	0.3173	0.152207	0.000298	0.0616563	0.580304	0.0320016	0.130124	0.0203	0.00011481	2.8204e-09	0.709618	0.75	0.324207	0.5271	0.08888	0.123038	0.64949	0.15725	0.316365	0.00564758	0.0641177	0.2914	0.0243008	0.1303	0.0740708	0.3242	0.263158	0.75
			Imputation quality	G	0.9974	G	G	G	G	1	G	1	G	0.9987	G	0.995833	0.9993	0.998962	0.96799	0.7042	G	0.977204	0.991306	0.999965	G	1	G	G	G	G	G	G	G
rs6474359	ANK1	T/C	N	1428	490	478	1434	2032	1373	1986	1451	770	-	2501	6777	-	342	710	568	1205	1524	1452	671	831	3538	675	-	-	-	1174	-	-	-
			FREQ	0.960434	0.963	0.972803	0.960948	0.962598	0.963583	0.967533	0.97886	0.96948	-	0.9615	0.9723	-	0.9621	0.974648	0.96479	0.995021	0.977362	0.95712	0.97637	0.967199	0.966942	0.964174	-	-	-	0.964	-	-	-
			Beta	0.0216527	0.11	-0.3524	0.0690994	0.0152069	0.0575119	0.132195	0.0676909	0.205556	-	0.049455	0.0742487	-	0.3952	0.00268596	0.1146	-0.0686	-0.00297345	0.0156851	-0.00677988	0.277723	0.0172536	0.0504511	-	-	-	0.097	-	-	-
			SE	0.0565013	0.085	0.2014	0.0889387	0.0447807	0.0355401	0.054499	0.0417944	0.0724517	-	0.0362198	0.0194849	-	0.2343	0.0557178	0.1065	0.08371	0.0504595	0.0408962	0.0926139	0.134108	0.0353203	0.0555599	-	-	-	0.045	-	-	-
			P-value	0.701564	0.1952	0.1187	0.437198	0.734169	0.105614	0.0152812	0.105533	0.00455194	-	0.172032	0.000138643	-	0.096	0.962922	0.282	0.4126	0.95301	0.70131	0.941642	0.0370244	0.625203	0.363466	-	-	-	0.034	-	-	-
			Imputation quality	G	0.9849	G	G	G	G	1	G	1	-	0.9905	0.941	-	0.9978	0.987009	0.915715	0.4684	G	0.956447	0.995039	0.99289	G	0.938973	-	-	-	G	-	-	-
rs4737009	ANK1	A/G	N	1428	490	480	1456	2068	1376	1994	1450	770	3346	2501	6777	699	342	531	568	1205	1745	1452	671	831	3538	675	-	-	-	1183	-	-	-
			FREQ	0.234594	0.231	0.23125	0.223558	0.234284	0.227471	0.232531	0.245399	0.249351	0.227	0.252	0.2386	0.240895	G	0.228814	0.2271	0.2336	0.251003	0.246186	0.269062	0.250301	0.24802	0.253894	-	-	-	0.249	-	-	-
			Beta	0.039547	0.038	0.09211	0.0271932	-0.0091707	0.0381997	0.064328	0.00839	0.002087	0.043	0.0118514	0.0341888	0.0574708	0.1242	-0.00987827	-0.0005395	0.01776	0.00719873	0.0638883	0.00025897	0.120381	0.0062206	0.0311122	-	-	-	0.052	-	-	-
			SE	0.026563	0.039	0.07263	0.0423253	0.0208676	0.0162425	0.022707	0.014498	0.0286941	0.019	0.0175442	0.00726767	0.0335879	0.1058	0.023098	0.04702	0.01458	0.017346	0.0190994	0.0316784	0.0558366	0.0139299	0.0226209	-	-	-	0.019	-	-	-
			P-value	0.141388	0.3139	0.2578	0.520561	0.660319	0.0186811	0.0046123	0.562999	0.942764	0.03193	0.499195	2.5482e-06	0.0870706	0.25	0.662307	0.9909	0.2232	0.678136	0.000822718	0.993478	0.0286428	0.655189	0.168405	-	-	-	0.0062	-	-	-
			Imputation quality	G	0.8343	G	G	G	G	1	G	0.999838	G	0.8449	G	0.904348	0.9185	0.838562	0.822183	0.5486	G	0.964841	0.933328	0.81506	G	0.993911	-	-	-	G	-	-	-
rs16926246	HK1	C/T	N	1428	490	-	1254	1810	-	1996	1462	770	3346	2501	6777	669	342	542	568	1205	1478	1452	671	831	3538	-	943	3313	410	1213	1733	647	1445	557
			FREQ	0.8669	0.9	-	0.939394	0.94558	-	0.906351	0.901764	0.905195	0.91	0.879	0.9069	0.919151	0.8998	0.968635	0.8838	0.9527	0.935386	0.894439	0.845917	0.877193	0.902148	-	0.878	0.870812	0.8756	0.875927	0.937	0.887944	0.87923	0.17
			Beta	0.0648991	0.115	-	-0.018635	0.126826	-	0.120364	0.056	0.131462	0.061	0.0834798	0.109858	0.0450156	0.1679	0.0650305	0.18	0.01984	0.0668212	0.0831881	0.0607593	0.0282988	0.0966356	-	0.026	0.108141	0.1304	0.100008	0.117	0.0701031	0.028	0.071
			SE	0.0410761	0.054	-	0.0643624	0.0317956	-	0.0384056	0.029	0.0485986	0.029	0.0219957	0.012672	0.0568402	0.1729	0.0356243	0.06295	0.02842	0.0267842	0.0269896	0.0434755	0.0681747	0.0238057	-	0.043	0.0193068	0.05939	0.0250763	0.022	0.0364672	0.049	0.038
			P-value	0.115098	0.03158	-	0.774172	6.74e-05	-	0.00172427	0.05187	0.00681792	0.04547	0.00014983	4.34595e-18	0.42838	0.34	0.0704794	0.004406	0.4852	0.0126067	0.00205459	0.162247	0.675248	4.921e-05	-	0.5376	2.303e-08	0.02871	7.05906e-05	1.08e-07	0.051872	0.5726	0.06
			Imputation quality	0.927017	0.939	-	0.73444	0.817393	-	0.737085	0.4866	0.753674	0.424	0.9646	0.6864	0.935562	0.941	0.71151	0.622357	0.3293	0.824582	0.947349	0.913377	0.964968	0.757593	-	G	G	G	G	G	G	G	G
rs1387153	MTNR1B	T/C	N	1428	490	480	948	1296	1378	1996	1462	770	-	2501	6777	669	342	716	568	1205	1611	1452	671	831	3538.01	675	-	-	-	1173	-	-	-
			FREQ	0.285714	0.268	0.291667	0.200422	0.212191	0.2723	0.275748	0.277676	0.29026	-	0.2924	0.2929	0.258088	0.271	0.288408	0.2606	0.3191	0.272191	0.282203	0.241479	0.291087	0.284511	0.282108	-	-	-	0.295	-	-	-
			Beta	0.0061829	0.083	0.008388	0.0076325	-0.0020911	0.054176	0.030833	0.026	0.0321251	-	0.0190224	0.0243897	0.026517	0.0645	0.0223321	0.01379	0.03474	-0.0009245	0.0459351	0.0485034	-0.0081245	0.0147303	0.0449285	-	-	-	0.0231	-	-	-
			SE	0.0269542	0.032	0.07407	0.045959	0.0217054	0.0178627	0.023682	0.016	0.0315613	-	0.0153222	0.00723454	0.03001	0.0962	0.020251	0.04509	0.01225	0.0173629	0.0181361	0.0313287	0.0476684	0.0139202	0.0245794	-	-	-	0.019	-	-	-
			P-value	0.823213	0.009648	0.9192	0.863063	0.924888	0.0024754	0.192936	0.09256	0.30901	-	0.214311	0.00074818	0.376909	0.51	0.274622	0.7598	0.004659	0.957717	0.0113158	0.121572	0.863719	0.289968	0.0685737	-	-	-	0.2241	-	-	-
			Imputation quality	0.886345	0.9975	0.694	0.78621	0.792731	0.767501	0.803163	0.7859	0.762274	-	G	0.9469	0.998964	1	G	0.991056	G	0.961607	0.989325	0.998618	G	0.962116	0.797681	-	-	-	G	-	-	-
rs7998202	ATP11A/TUBGCP3	G/A	N	1428	490	480	674	911	1378	1996	1462	770	3346	2501	6777	669	342	706	568	1205	1355	1452	671	831	3538	675	-	-	-	1183	-	-	-
			FREQ	0.129902	0.137	0.147917	0.037092	0.0450055	0.153369	0.133345	0.101582	0.136364	121	0.1447	0.1573	0.176691	0.1213	0.13881	0.1391	0.144	0.127306	0.146444	0.151258	0.131555	0.143715	0.127449	-	-	-	0.105	-	-	-
			Beta	0.0194364	0.132	-0.0125	0.0595597	0.119269	0.02197	0.066834	0.03	0.0451029	-0.004	0.0193406	0.0412947	-0.0421093	0.0956	0.0129107	0.04861	0.01829	0.0404329	0.0170816	0.00950428	-0.0012895	0.0386779	0.0101511	-	-	-	0.0214	-	-	-
			SE	0.0420011	0.043	0.09063	0.0746433	0.0375558	0.0229299	0.0283541	0.027	0.0448369	0.025	0.0199027	0.0103083	0.0337252	0.1326	0.0271661	0.05676	0.01535	0.0234284	0.0236547	0.038252	0.0681525	0.0197056	0.0459419	-	-	-	0.0236	-	-	-
			P-value	0.643505	0.002261	0.9017	0.425772	0.0015078	0.339229	0.0184173	0.2654	0.312309	0.8759	0.331022	6.17645e-05	0.211811	0.48	0.637808	0.3921	0.2338	0.0843928	0.470219	0.803775	0.984797	0.0496707	0.821202	-	-	-	0.364	-	-	-
			Imputation quality	0.816751	0.9899	0.48	0.411472	0.419636	0.65206	0.987398	0.3753	0.580292	0.425	0.9911	0.7208	0.984996	0.9947	0.986854	0.930367	0.6142	0.818153	0.964444	0.9649	0.983248	0.787178	0.42504	-	-	-	G	-	-	-
rs1046896	FN3K	T/C	N	1428	490	476	1431	2047	1378	1995	1443	770	3346	2501	6777	669	342	596	568	1205	1725	1452	671	831	3537.99	675	942	3319	409	1214	1726	647	1445	581
			FREQ	0.314426	0.327	0.280462	0.319357	0.305569	0.300798	0.330823	0.330561	0.333117	0.455	0.3199	0.3146	0.295715	0.2409	0.337248	0.309	0.2618	0.323188	0.2943	0.308715	0.411937	0.305485	0.264516	0.31	0.322386	0.2971	0.319605	0.253	0.320711	0.43598	0.39
			Beta	0.0281659	0.093	0.09991	-0.0275873	0.0042983	0.0455034	0.0227743	0.03707	0.0502379	0.03	0.0310282	0.0290228	0.0463983	0.0656	0.0224653	-0.009929	0.04556	0.0419179	0.0766806	0.0204328	0.0216906	0.0324112	0.0426613	0.032	0.0174054	0.1032	0.0257401	0.059	0.00014965	0.048	0.009
			SE	0.0236902	0.031	0.06954	0.0387313	0.0194067	0.0151713	0.0204767	0.013132	0.0259533	0.017	0.0147026	0.00673401	0.029377	0.1006	0.021338	0.04208	0.01324	0.0165458	0.0193701	0.0283071	0.0465026	0.0133298	0.0221473	0.03	0.0139642	0.04348	0.01784	0.012	0.0251903	0.033	0.027
			P-value	0.233583	0.003281	0.2	0.476295	0.824714	0.0027059	0.266049	0.00482508	0.0529867	0.09269	0.0348339	1.6334e-05	0.114242	0.52	0.29692	0.8136	0.0005987	0.0112946	7.53578e-05	0.470401	0.638548	0.0150368	0.0540901	0.2817	0.212697	0.01808	0.149328	1.29e-06	0.995262	0.144	0.742
			Imputation quality	G	0.9926	G	G	G	G	1	G	0.999221	G	0.9953	G	0.952296	0.992	0.897478	0.987216	0.8087	G	0.868812	0.997897	G	G	0.992139	G	G	G	G	G	G	G	G
rs855791	TMPRSS6	A/G	N	1428	490	480	507	700	1378	1996	1462	770	3346	2501	6777	669	342	716	568	1205	1561	1452	671	831	3537.99	675	-	-	-	1183	-	-	-
			FREQ	0.414916	0.401	0.409375	0.287968	0.297858	0.41773	0.399668	0.401156	0.402597	0.434	0.4308	0.4388	0.410461	0.5986	0.458799	0.4155	0.3535	0.427931	0.443059	0.438203	0.426118	0.446107	0.380784	-	-	-	0.571	-	-	-
			Beta	0.0171603	0.043	0.07147	0.0080594	0.0424717	0.0305387	0.062888	0.023	-0.0069194	0.012	0.0258774	0.026425	-0.00297611	-0.0293	0.0155362	0.03682	0.04497	0.0165502	0.0233729	0.0321853	0.0193442	0.0257071	0.0056955	-	-	-	0.0438	-	-	-
			SE	0.0270732	0.03	0.06848	0.0454705	0.0225355	0.0161851	0.0232608	0.016	0.0294701	0.017	0.0143562	0.00646522	0.0260346	0.0886	0.0190996	0.03946	0.01206	0.0157237	0.0171081	0.0269669	0.0455527	0.0125401	0.0243554	-	-	-	0.017	-	-	-
			P-value	0.513768	0.1526	0.35	0.854155	0.0601415	0.0567649	0.006859	0.1624	0.812388	0.5281	0.0714426	4.36508e-05	0.908989	0.74	0.420334	0.3512	0.0002013	0.292142	0.17188	0.232669	0.668905	0.0403654	0.826568	-	-	-	0.01	-	-	-
			Imputation quality	0.809237	0.9733	0.699	0.616909	0.636609	0.736318	0.691934	0.5719	0.731591	0.558	G	0.9553	0.990106	1	G	0.963619	G	0.956779	0.91736	0.969984	1	0.953804	0.700549	-	-	-	G	-	-	-

## Sheet: Table S3
Table S3. Associations of ten independent HbA1C-associated loci with glycemic and erythrocyte traits and disease
				MAGIC						GIANT	This study (KORA F3 + KORA F4 + SardiNIA + NHANES III)					DIAGRAM +	This study
SNP	Nearest gene	Effect/ other		Fasting glucose (mmol/L)	HOMA-B	Fasting insulin (pmol/L, log scale)	HOMA-IR	2-hr glucose (mmol/L)1	2-hr insulin (pmol/L, log)1	BMI (kg/m2)2	Hb (g/L)	MCH (pg)	MCV (fl)	Iron (μmol/l)	Transferrin (g/L)	Type 2 diabetes4	CAD5
rs2779116	SPTA1	T/C	Effect	-0.001 (0.004)	0.007 (0.004)	0.007 (0.004)	0.007 (0.004)	-0.013 (0.020)	0.001 (0.013)	-0.0038 (0.0094)	0.247 (0.241)	0.091 (0.046)	0.346 (0.116)	0.111 (0.135)	0.013 (0.009)	1.00 [0.95-1.04]	1.012 [0.969-1.058]
			P-value	0.7418	0.0652	0.104	0.117	0.539	0.927	0.686	0.306	0.046	2.0 x 10‐3	0.411	0.168	0.9	0.59
			N	46232	36653	38382	37119	15234	7062	32529.8	6322	6322	6322	6322	6322	8,130/38,987	13,925/1,4590
rs552976	G6PC2/ABCB11	G/A	Effect	0.066 (0.004)	-0.035 (0.003)	-0.007 (0.004)	0.003 (0.004)	0.020 (0.019)	-0.025 (0.012)	-0.0053 (0.0089)	0.111 (0.201)	0.072 (0.036)	0.181 (0.092)	-0.153 (0.116)	-0.004 (0.008)	0.95 (0.92-1.99)	1.052 [1.001-1.106]
			P-value	7.1 x 10‐66	2.3 x 10‐24	0.09626	0.5532	0.305	0.03379	0.5507	0.581	0.0467	0.05	0.186	0.618	0.02	0.044
			N	45058	35480	37209	35946	15233	7062	32490.9	7505	7505	7505	7502	6301	8,130/38,987	10,726/10,246
rs1800562	HFE	G/A	Effect	-0.003 (0.009)	-0.001 (0.008)	0.004 (0.009)	0.001 (0.009)	0.028 (0.043)	0.018 (0.025)	0.0064 (0.0229)	-1.37 (0.458)	-0.591 (0.078)	-1.405 (0.199)	-1.84 (0.271)	0.155 (0.019)	1.01 [0.91-1.11]	1.058 [0.982-1.139]
			P-value	0.701	0.931	0.64	0.912	0.508	0.461	0.78	3.0 x 10‐3	3.5 x 10‐14	1.6 x 10‐12	1.2 x 10‐11	3.5 x 10‐15	0.85	0.136
			N	41931	34254	35935	34720	15227	7055	25245	7520	7520	7520	7517	6308	6,206/36,049	13,925/14,590
rs1799884	GCK	T/C	Effect	0.062 (0.005)	-0.026 (0.005)	0.005 (0.005)	0.014 (0.005)	0.096 (0.026)	-0.013 (0.015)	0.0036 (0.0113)	0.194 (0.253)	-0.034 (0.045)	-0.170 (0.115)	0.040 (0.147)	-0.0004 (0.001)	1.03 (0.97-1.09)	1.008 [0.957-1.062]
			P-value	6.4 x 10‐37	5.9 x 10‐9	0.367	0.0124	2.7 x 10‐4	0.3927	0.7497	0.444	0.446	0.139	0.784	0.973	0.29	0.768
			N	46239	36661	38390	37127	15234	7062	32495.7	7533	7533	7533	7530	6320	8,130/38,987	13,925/14,590
rs4737009	ANK1	A/G	Effect	0.005 (0.005)	-0.008 (0.004)	-0.006 (0.005)	-0.007 (0.005)	-0.002 (0.022)	0.012 (0.014)	0.0024 (0.0101)	-0.176 (0.224)	0.039 (0.040)	0.289 (0.102)	0.174 (0.130)	-0.0004 (0.009)	1.05 [1.00-1.10]	1.025 [0.978-1.073]
			P-value	0.2714	0.05011	0.1813	0.1438	0.9416	0.4051	0.8128	0.432	0.324	4.5 x 10‐3	0.181	0.956	0.069	0.305
			N	42800	35125	36806	35591	15228	7058	32478.1	7502	7502	7502	7499	6320	8,130/38,987	13,925/14,590
rs16926246	HK1	C/T	Effect	0.007 (0.008)	-0.001 (0.007)	0.013 (0.008)	0.011 (0.008)	-0.007 (0.053)	-0.004 (0.028)	0.006 (0.0196)	-1.378 (0.356)	0.075 (0.064)	-0.130 (0.163)	0.079 (0.210)	-0.006 (0.016)	-	1.039 [0.975-1.106]
			P-value	0.3942	0.9369	0.1022	0.2137	0.8916	0.8907	0.76	1.1 x 10‐4	0.241	0.425	0.708	0.708	-	0.237
			N	43289	33741	35469	34207	10075	3690	22159	7534	7534	7534	7531	6322	-	12,525/12,990
rs1387153	MTNR1B	T/C	Effect	0.060 (0.004)	-0.029 (0.004)	-0.003 (0.005)	0.006 (0.005)	0.053 (0.022)	0.029 (0.013)	0.0055 (0.01)	-0.072 (0.254)	-0.035 (0.041)	-0.112 (0.106)	-0.176 (0.120)	-0.024 (0.010)	1.12 (1.08-1.18)	1.027 [0.969-1.088]
			P-value	6.6 x 10‐45	1.1 x 10‐14	0.4388	0.2193	0.01358	0.02642	0.5835	0.7583	0.403	0.289	0.143	0.0159	1.0 x 10-6	0.374
			N	40934	31469	33182	31919	15234	7062	28223.2	7494	7494	7494	7510	6322	8,130/38,987	11,126/10,009
rs7998202	ATP11A/TUBGCP3	G/A	Effect	0.009 (0.006)	-0.001 (0.005)	0.004 (0.006)	0.004 (0.006)	0.014 (0.029)	0.003 (0.017)	0.0109 (0.0152)	0.083 (0.324)	-0.065 (0.059)	-0.238 (0.149)	0.060 (0.191)	0.007 (0.014)	1.04 [0.98-1.11]	0.989 [0.911-1.073]
			P-value	0.102	0.857	0.472	0.53	0.618	0.847	0.4719	0.798	0.2664	0.1117	0.753	0.636	0.22	0.784
			N	43984	33724	35453	34189	15234	6411	32517.3	7504	7504	7504	7501	6322	8,130/38,987	9,726/8,409
rs1046896	FN3K	T/C	Effect	0.005 (0.004)	0.002 (0.004)	0.004 (0.004)	0.003 (0.004)	0.013 (0.020)	0.022 (0.012)	-0.0089 (0.009)	-0.069 (0.208)	-0.024 (0.037)	-0.085 (0.094)	-0.176 (0.129)	0.006 (0.009)	1.00 [0.95-1.04]	0.968 [0.920-1.017]
			P-value	0.241	0.546	0.35	0.49	0.522	0.0731	0.322	0.74	0.511	0.369	0.143	0.477	0.95	0.199
			N	44286	34708	36437	35174	15232	7061	32441.6	7513	7513	7513	7510	6300	8,130/38,987	12,001/11,653
rs855791	TMPRSS6	A/G	Effect	0.007 (0.004)	0.001 (0.004)	0.005 (0.004)	0.005 (0.004)	-0.025 (0.020)	-0.001 (0.013)	-0.0088 (0.0098)	-0.611 (0.214)	-0.214 (0.038)	-0.528 (0.098)	-1.001 (0.126)	0.012 (0.009)	1.00 [0.96-1.05]	1.038 [0.989-1.089]
			P-value	0.09508	0.8232	0.2481	0.2457	0.221	0.9167	0.3703	4.1 x 10-3	2.9 x 10‐8	7.7 x 10‐8	1.1 x 10‐15	0.206	0.94	0.132
			N	44603	35047	36776	35513	15234	7062	32521.3	7504	7504	7504	7501	6322	8,130/38,987	12,001/11,653
1 Results for fasting glucose, insulin and HOMA-B and HOMA-IR are from Dupuis et al (Nat. Genet, 2010). For the 2-hr analyses we present BMI-adjusted results for consistency with the convention used in Saxena et al (Nat Gen, 2010).
2 Results for BMI associations are from Willer et al (Nat Genet, 2009)
3 Hb = Hemoglobin; MCH = Mean corpuscular hemoglobin; MCV = Mean corpuscular volume.
4 T2D results for are from DIAGRAM+ (Voight et al, Nat Genet 2010). For rs1800562 the available sample size in DIAGRAM+ was 6,206 cases and 36,049 controls. Data are OR [±95% CI], N indicates the number of cases/controls. Results for proxies are presented for 5 signals: (a) for rs552976 a proxy rs560887 was used (r2=0.666; G=>C); (b) for rs1800562 a proxy rs1408272 was used (r2=0.793; T=>G); (c) …
5 N indicates the number of cases/controls

## Sheet: Table S4
Table S4. Associations with HbA1C of ten independent loci conditioned on hematologic and iron parameters
				Iron/hematologic
SNP	Nearest Locus	Effect/ Other		HbA1C (%) adjusted for sex and age	HbA1C (%) adjusted for Hb (g/l), sex and age	HbA1C (%) adjusted for MCV (fl), sex and age	HbA1C (%) adjusted for MCH (pg), sex and age	HbA1C (%) adjusted for iron (μmol/l), sex and age	HbA1C (%) adjusted for transferrin (g/l), sex and age
rs2779116	SPTA1	T/C	Beta (SE)	0.025 (0.008)	0.025 (0.008)	0.029 (0.008)	0.028 (0.008)	0.026 (0.008)	0.024 (0.008)
			P-value	2.5x10-3	2.9x10-3	4.8x10-4	7.1x10-4	2.0x10-3	3.5x10-3
			N	6322	6322	6322	6322	6322	6322
rs552976	ABCB11/G6PC2	G/A	Beta (SE)	0.029 (0.007)	0.029 (0.007)	0.032 (0.007)	0.032 (0.007)	0.029 (0.007)	0.027 (0.008)
			P-value	3.1x10-5	4.7x10-5	3.6x10-6	2.3x10-6	4.6x10-5	3.4x10-4
			N	7506	7505	7505	7505	7502	6301
rs1800562	HFE	G/A	Beta (SE)	0.073 (0.016)	0.072 (0.016)	0.057 (0.016)	0.051 (0.016)	0.060 (0.016)	0.066 (0.018)
			P-value	4.7x10-6	7.3x10-6	3.6x10-4	1.2x10-3	1.7x10-4	2.8x10-4
			N	7521	7520	7520	7520	7517	6308
rs1799884	GCK	T/C	Beta (SE)	0.042 (0.009)	0.043 (0.009)	0.041 (0.009)	0.041 (0.009)	0.043 (0.009)	0.043 (0.009)
			P-value	1.8x10-6	1.1x10-6	2.8x10-6	2.4x10-6	1.1x10-6	7.4x10-6
			N	7534	7533	7533	7533	7530	6320
rs6474359	ANK1	T/C	Beta (SE)	0.100 (0.026)	0.098 (0.026)	0.108 (0.025)	0.105 (0.025)	0.105 (0.026)	0.101(0.031)
			P-value	1.1x10-4	1.1x10-4	2.5x10-5	3.6x10-5	4.5x10-5	0.001
			N	3961	3962	3961	3961	3958	2788
rs4737009	ANK1	A/G	Beta (SE)	0.020 (0.008)	0.020 (0.008)	0.023 (0.008)	0.021 (0.008)	0.021 (0.008)	0.012 (0.008)
			P-value	0.013	0.012	2.5x10-3	5.2x10-3	6.9x10-3	0.146
			N	7503	7502	7502	7502	7499	6320
rs16926246	HK1	C/T	Beta (SE)	0.076 (0.013)	0.077 (0.013)	0.074 (0.012)	0.073 (0.012)	0.076 (0.013)	0.067 (0.014)
			P-value	1.2x10-9	9.6x10-10	1.8x10-9	2.0x10-9	1.1x10-9	2.9x10-6
			N	7535	7534	7534	7534	7531	6322
rs1387153	MTNR1B	T/C	Beta (SE)	0.020 (0.090)	0.020 (0.09)	0.018 (0.090)	0.018 (0.090)	0.018 (0.090)	0.022 (0.010)
			P-value	0.024	0.023	0.033	0.033	0.044	0.023
			N	4149	4148	4148	4148	4145	2976
rs7998202	TUBGCP3/ATP11A	G/A	Beta (SE)	0.024 (0.011)	0.024 (0.011)	0.020 (0.011)	0.021 (0.011)	0.023 (0.011)	0.023 (0.013)
			P-value	0.039	0.036	0.071	0.066	0.042	0.068
			N	7505	7504	7504	7504	7501	6322
rs1046896	FN3K	T/C	Beta (SE)	0.035 (0.007)	0.036 (0.007)	0.034 (0.007)	0.034 (0.007)	0.035 (0.007)	0.036 (0.008)
			P-value	1.1x10-6	8.1x10-7	1.6x10-6	1.2x10-6	1.9x10-6	3.8x10-6
			N	7514	7513	7513	7513	7510	6300
rs855791	TMPRSS6	A/G	Beta (SE)	0.021 (0.008)	0.021 (0.008)	0.015 (0.007)	0.014 (0.007)	0.014 (0.008)	0.014 (0.008)
			P-value	4.3x10-3	5.1x10-3	0.041	0.061	0.057	0.08
			N	7505	7504	7504	7504	7501	6322

## Sheet: Table S5
Table S5. Descriptive statistics of coronary artery disease association cohorts
Case/control series	N Cases/controls	% of MI	% females Cases/Controls	Mean (SD) Age Cases/Controls	CAD definition	Control definition
WTCCC-CAD	1,924/2,937	71.5 (first event)	20.7 / 51.0	49.4 (7.7) at first event 60.1(8.1) at recruitment	CAD defined as validated MI, CABG, PTCA or angina with positive non-invasive testing before 66 years of age	Unselected
GerMIFS I	875/1644	100	32.5 / 50.8	50.2 (7.9) / 62.5 (10.1)	MI (< 65 yrs) with > 1 first-degree sibling with severe CAD (PTCA; MI; CABG)	Population sample
GerMIFS II	1,222/1,298	100	20.3 / 47.9	51.3 (7.6) / 51.2 (11.9)	MI (< 60 yrs); 59.4% with family history of CAD	Population sample
Medstar	875/447	48	33.0 / 54.6	48.9 (6.4) / 59.7 (8.9)	Angiography (>50% stenosis)	Angiography normal
Pencath	933/468	50	23.7 / 51.9	52.7 (7.6) / 61.7 (9.6)	Angiographic (>50% stenosis)	Angiography normal
Ottawa Heart Study	1,542/1,455	61.6	24.1 / 48.0	48.7 (7.3) / 75.0 (5.0)	Angiographic (>50% stenosis)	Asymptomatic
EPIC	421/2,698	TBC	33.0 / 58.9	64.1 (7.4) / 58.0 (8.8)	Prevalent or incident IHD as either self-reported at baseline healthcheck or death certificate/hospital discharge notes. For the latter, IHD is defined as ICD9 410-414 or ICD10 I20-I25. Participants with prevalent or incident stroke were excluded.	No evidence of prevalent or incident IHD, or prevalent or incident stroke.
MiGen	1,275/1,407	100	37.2 / 39.9	46.4 (6.3) / 47.4 (8.2)	MI (men<45 yr / women<55 yr)	Random population sample
PROCARDIS	4,858/2,236	0.79	24.7 / 24.4	61.8 (7.5) / 55.2 (8.4)	CAD defined as diagnosed MI or acute coronary syndrome before 66 years of age with sibling with CAD before 66 years.	No personal or sibling history of CAD before age 66 years
Total	13,925/14,590
Note: CABG = Coronary artery bypass graft; PTCA= Percutanerous Transluminal Coronary Angioplasty.

## Sheet: Table S6
Table S6. Associations of ten HbA1C-associated loci with coronary artery disease
SNP	CHR	POS	Locus	Effect/Other	Study	EPIC	WTCCC-CAD	OHGS	GerMIFSI	GerMIFSII	PennCATH	MedSTAR	PROCARDIS	MIGen
					N	421/2,698	1,924/2,937	1,542/1,455	875/1644	1,222/1,298	933/468	875/447	4,858/2,236	1,275/1,407
rs2779116	1	156852039	SPTA1	T/C	MAF	0.259	0.349	0.275	0.252	0.252	0.252	0.265	0.266	0.276468
					OR [95% CI]	1.069 [0.899-1.273]	1.003 [0.921-1.093]	0.984 [0.873-1.108]	1.093 [0.961-1.244]	0.923 [0.812-1.049]	1.006 [0.821-1.233]	0.981 [0.813-1.183]	1.045 [0.938-1.165]	1.076 [0.809-1.432]
					P	0.45	0.94	0.785	0.181	0.225	0.955	0.839	0.42	0.612
rs552976	2	169616945	G6PC2/ABCB11	G/A	MAF	0.362	-	0.345	0.344	0.34	0.34	0.354	0.347	-
					OR [95% CI]	1.098 [0.933-1.292]	-	0.965 [0.860-1.082]	1.011 [0.898-1.139]	1.058 [0.942-1.19]	1.171 [0.966-1.42]	0.968 [0.785-1.194]	1.126 [1.017-1.248]	-
					P	0.261	-	0.541	0.854	0.342	0.108	0.763	0.023	-
rs1800562	6	26201120	HFE	G/A	MAF	0.062	0.182	0.064	0.048	0.04	0.055	0.068	0.06	0.0561358
					OR [95% CI]	1.271 [0.925-1.745]	1.02 [0.918-1.134]	0.928 [0.738-1.166]	1.053 [0.808-1.371]	1.053 [0.794-1.396]	1.183 [0.792-1.768]	1.368 [0.926-2.021]	1.175 [0.942-1.466]	0.920 [0.528-1.603]
					P	0.139	0.707	0.519	0.699	0.716	0.412	0.116	0.153	0.7675
rs1799884	7	44002308	GCK	T/C	MAF	0.166	0.23	0.176	0.186	0.157	0.188	0.173	0.181	0.173507
					OR [95% CI]	1.188 [0.962-1.468]	0.969 [0.879-1.067]	1.003 [0.869-1.157]	0.947 [0.819-1.096]	1.11 [0.953-1.292]	0.952 [0.755-1.202]	0.968 [0.744-1.26]	1.035 [0.908-1.18]	0.970 [0.694-1.356]
					P	0.11	0.518	0.97	0.458	0.187	0.68	0.808	0.603	0.8574
rs4737009	8	41749562	ANK1	A/G	MAF	0.233	0.315	0.239	0.259	0.254	0.229	0.241	0.251	0.243006
					OR [95% CI]	0.92 [0.765-1.107]	1.024 [0.938-1.118]	0.995 [0.875-1.131]	1.196 [1.053-1.358]	0.98 [0.863-1.113]	1.143 [0.92-1.421]	0.863 [0.682-1.093]	1.021 [0.906-1.15]	0.958 [0.712-1.290]
					P	0.379	0.593	0.939	0.005	0.76	0.228	0.223	0.737	0.7777
rs16926246	10	70763398	HK1	C/T	MAF	0.116	0.263	0.052	0.01	0.106	0.023	0.049	0.118	0.0151229
					OR [95% CI]	0.858 [0.653-1.126]	1.056 [0.962-1.158]	1.234 [1.009-1.511]	1.824 [0.971-3.426]	1.008 [0.842-1.206]	0.777 [0.546-1.105]	1.184 [0.876-1.599]	0.975 [0.836-1.138]	0.895 [0.519-1.544]
					P	0.268	0.253	0.041	0.057	0.935	0.16	0.271	0.752	0.6885
rs1387153	11	92313476	MTNR1B	T/C	MAF	0.282	-	0.207	-	0.296	0.294	0.285	0.291	0.29151
					OR [95% CI]	1.084 [0.888-1.323]	-	1.095 [0.956-1.254]	-	1.027 [0.909-1.159]	0.985 [0.809-1.199]	0.852 [0.708-1.024]	1.057 [0.949-1.177]	0.955 [0.713-1.278]
					P	0.429	-	0.189	-	0.665	0.88	0.088	0.312	0.755
rs7998202	13	112379869	ATP11A/TUBGCP3	G/A	MAF	0.124	-	0.05	-	0.12	0.101	0.097	0.142	0.107801
					OR [95% CI]	0.974 [0.701-1.352]	-	1.055 [0.864-1.287]	-	0.959 [0.808-1.137]	0.851 [0.624-1.162]	1.027 [0.775-1.36]	1.015 [0.884-1.165]	0.870 [0.576-1.314]
					P	0.873	-	0.602	-	0.624	0.31	0.855	0.831	0.5049
rs1046896	17	78278822	FN3K	T/C	MAF	0.319	-	0.319	0.318	0.318	0.334	0.314	0.321	0.326744
					OR [95% CI]	0.841 [0.71-0.995]	-	1.011 [0.9-1.136]	0.865 [0.766-0.978]	0.959 [0.852-1.08]	0.999 [0.824-1.211]	1.154 [0.93-1.433]	1.013 [0.912-1.126]	1.051 [0.800-1.381]
					P	0.043	-	0.854	0.02	0.499	0.995	0.195	0.81	0.7202
rs855791	22	35792882	TMPRSS6	A/G	MAF	0.416	-	0.33	0.424	0.446	0.451	0.446	0.435	0.42743
					OR [95% CI]	1.023 [0.839-1.247]	-	1.064 [0.935-1.211]	1.071 [0.956-1.201]	1.042 [0.932-1.164]	1.024 [0.854-1.228]	0.863 [0.728-1.024]	1.073 [0.973-1.183]	0.993 [0.760-1.299]
					P	0.83	-	0.353	0.218	0.468	0.798	0.091	0.156	0.9613
Note: Empty cells contain SNPs not passing QC in this dataset
