# Supplementary material for: Common Variants at 10 Genomic Loci Influence Hemoglobin A1C Levels via Glycemic and Nonglycemic Pathways
Source: PubMed Central journal article supplement — Diabetes. 2010 Sep 21;59(12):3229–39. doi: 10.2337/db10-0502 (PMC2992787; doi:10.2337/db10-0502), 2010-09-21
Supplement: supp_db10-0502_db100502onlineappendix.pdf [file supp_db10-0502_db100502onlineappendix.pdf]

## Institutional affiliations

<sup>1</sup>Human Genetics, Wellcome Trust Sanger Institute, Hinxton, U.K.; the <sup>2</sup>Department of Twin Research and Genetic Epidemiology, King's College London, London, U.K.; <sup>3</sup>Istituto di Neurogenetica e Neurofarmacologia, CNR, Monserrato, Italy; the <sup>4</sup>Institute of Epidemiology, Helmholtz Zentrum München, German Research Center for Environmental Health, Neuherberg, Germany; the <sup>5</sup>Institute for Community Medicine, Ernst Moritz Arndt University Greifswald, Greifswald, Germany; the <sup>6</sup>Department of Biostatistics, Boston University School of Public Health, Boston, Massachusetts; the <sup>7</sup>National Heart, Lung, and Blood Institute's Framingham Heart Study, Framingham, Massachusetts; <sup>8</sup>CNRS-UMR-8090, Institut Pasteur de Lille and Lille 2 University, Lille, France; the <sup>9</sup>MRC Epidemiology Unit, Institute of Metabolic Science, Cambridge, U.K.; the <sup>10</sup>Oxford Centre for Diabetes, Endocrinology and Metabolism, University of Oxford, Oxford, U.K.; the <sup>11</sup>Wellcome Trust Centre for Human Genetics, University of Oxford, Oxford, U.K.; the <sup>12</sup>Center for Human Genetic Research, Massachusetts General Hospital, Boston, Massachusetts; the <sup>13</sup>Program in Medical and Population Genetics, Broad Institute of Harvard and MIT, Cambridge, Massachusetts; the <sup>14</sup>Department of Medicine, Harvard Medical School, Boston, Massachusetts; the <sup>15</sup>Public Health and Primary Care, Strangeways Research Laboratory, University of Cambridge, Cambridge, U.K.; the <sup>16</sup>Wellcome Trust Sanger Institute, Hinxton, Cambridge, U.K.; the <sup>17</sup>Hematology Division, Children's Hospital Boston, Boston, Massachusetts; the <sup>18</sup>Cardiovascular Research Institute, MedStar Research Institute, Washington Hospital Center, Washington, D.C.; the <sup>19</sup>Institute for Translational Medicine and Therapeutics, School of Medicine, University of Pennsylvania, Philadelphia, Pennsylvania; the <sup>20</sup>Cardiovascular Institute, University of Pennsylvania, Philadelphia, Pennsylvania; <sup>21</sup>Medicine, University of Ottawa Heart Institute, Ottawa, Canada; the <sup>22</sup>Department of Molecular Biology, Massachusetts General Hospital, Boston, Massachusetts; <sup>23</sup>Institut für Medizinische Biometrie und Statistik, Universität zu Lübeck, Lübeck, Germany; <sup>24</sup>Medizinische Klinik II, Universität zu Lübeck, Lübeck, Germany; the <sup>25</sup>Department of Health Sciences, University of Leicester, Leicester, U.K.; the <sup>26</sup>McKusick-Nathans Institute of Genetic Medicine and Department of Medicine, Johns Hopkins University, Baltimore, Maryland; <sup>27</sup>INSERM U70, Villejuif, France; <sup>28</sup>University Paris-Sud, Orsay, France; the <sup>29</sup>Human Genetics Center and Institute of Molecular Medicine, University of Texas Health Science Center at Houston, Houston, Texas; the <sup>30</sup>Division of Endocrinology and Diabetes, Graduate School Molecular Endocrinology and Diabetes, University of Ulm, Ulm, Germany; the <sup>31</sup>Genome Technology Branch, National Human Genome Research Institute, Bethesda, Maryland; <sup>32</sup>Biological Psychology, VU University Amsterdam, Amsterdam, the Netherlands; the <sup>33</sup>Department of Medicine III, Division Prevention and Care of Diabetes, University of Dresden, Dresden, Germany; the <sup>34</sup>Department of Medicine, University of Leipzig, Leipzig, Germany; the <sup>35</sup>Centre for Population Health Sciences, University of Edinburgh, Edinburgh, Scotland; the <sup>36</sup>Department of Epidemiology and Public Health, Imperial College London, London, U.K.; the <sup>37</sup>Clinical Trials Services Unit, University of Oxford, Oxford, U.K.; the <sup>38</sup>Departments of Epidemiology, Biostatistics, and Medicine, Johns Hopkins University, Baltimore, Maryland; the <sup>39</sup>Laboratory of Clinical Investigation, National Institute on Aging, Baltimore, Maryland; <sup>40</sup>Cardiovascular Epidemiology and Genetics, Institut Municipal D'investigacio Medica, and CIBER Epidemiología y Salud Publica, Barcelona, Spain; the <sup>41</sup>Clinical Research Branch, National Institute on Aging, Baltimore, Maryland; the <sup>42</sup>Division of Endocrinology, Diabetes, and Hypertension, Brigham and Women's Hospital, Boston, Massachusetts; <sup>43</sup>Dipartimento di

Ricerca Cardiovascolare, Istituto di Ricerche Farmacologiche “Mario Negri”, Milano, Italy; the <sup>44</sup>Department of Cardiovascular Medicine, University of Oxford, Oxford, U.K.; <sup>45</sup>Immunology and Transfusion Medicine, Ernst Moritz Arndt University Greifswald, Greifswald, Germany; the <sup>46</sup>Division of Community Health Sciences, St George’s, University of London, London, U.K.; <sup>47</sup>Cardiovascular Sciences, University of Leicester, Leicester, U.K.; the <sup>48</sup>Atherosclerosis Research Unit, Department of Medicine, Karolinska Institutet, Stockholm, Sweden; the <sup>49</sup>Human Genetics Unit, Medical Research Council, Edinburgh, U.K.; <sup>50</sup>Statistical Genetics, Centre National de Genotypage, Evry, France; the <sup>51</sup>Institute for Clinical Diabetology, German Diabetes Centre, Leibniz Centre at Heinrich Heine University Düsseldorf, Düsseldorf, Germany; the <sup>52</sup>Interfaculty Institute for Genetics and Functional Genomics, Ernst Moritz Arndt University Greifswald, Greifswald, Germany; the <sup>53</sup>Center for Statistical Genetics, University of Michigan School of Public Health, Ann Arbor, Michigan; <sup>54</sup>Chronic Disease Prevention, National Institute for Health and Welfare, Turku, Finland; <sup>55</sup>LURIC Study nonprofit LLC, Freiburg, Germany; <sup>56</sup>Genetics, Drug Discovery, GlaxoSmithKline, King of Prussia, Pennsylvania; <sup>57</sup>Statistics, deCODE genetics, Reykjavik, Iceland; the <sup>58</sup>National Heart and Lung Institute, Hammersmith Hospital Campus, Imperial College London, London, U.K.; the <sup>59</sup>Department of Epidemiology, Johns Hopkins University, Baltimore, Maryland; the <sup>60</sup>Interdisciplinary Centre for Clinical Research, University of Leipzig, Leipzig, Germany; the <sup>61</sup>Department of Medicine, University of Kuopio and Kuopio University Hospital, Kuopio, Finland; <sup>62</sup>Centre National de Genotypage, Evry, France; <sup>63</sup>Biostatistics and Epidemiology, University of Pennsylvania, Philadelphia, Pennsylvania; the <sup>64</sup>Department of Clinical Sciences, Lund University, Malmö, Sweden; the <sup>65</sup>Department of Medical Epidemiology and Biostatistics, Karolinska Institutet, Stockholm, Sweden; the <sup>66</sup>Diabetes and Lipids Research Laboratory, Madrid, Spain; <sup>67</sup>Fundación Investigación Biomédica del Hospital Clínico San Carlos, Madrid, Spain; the <sup>68</sup>Department of Social Medicine, University of Bristol, Bristol, U.K.; the <sup>69</sup>Institute of Human Genetics, Technische Universität München, München, Germany; the <sup>70</sup>Institute of Human Genetics, Helmholtz Zentrum München, German Research Center for Environmental Health, Neuherberg, Germany; the <sup>71</sup>Department of Genetics, University of North Carolina, Chapel Hill, North Carolina; the <sup>72</sup>Diabetes Research Center (Diabetes Unit), Massachusetts General Hospital, Boston, Massachusetts; the <sup>73</sup>Institute for Clinical Chemistry and Laboratory Medicine, Ernst Moritz Arndt University Greifswald, Greifswald, Germany; the <sup>74</sup>Division of Epidemiology and Community Health, University of Minnesota, Minneapolis, Minnesota; the <sup>75</sup>Department of Chronic Disease Prevention, National Institute for Health and Welfare, Helsinki, Finland; <sup>76</sup>The Institute of Molecular Medicine, University of Helsinki, Helsinki, Finland; <sup>77</sup>Chronic Disease Prevention, National Institute for Health and Welfare, Helsinki, Finland; <sup>78</sup>Andrija Stampar School of Public Health, University of Zagreb Medical School, Zagreb, Croatia; <sup>79</sup>Gen-Info Ltd., Zagreb, Croatia; the <sup>80</sup>Institute of Biometrics and Epidemiology, German Diabetes Centre, Leibniz Centre at Heinrich Heine University Düsseldorf, Düsseldorf, Germany; the <sup>81</sup>Department of Human Genetics, Faculty of Medicine, McGill University Montreal, Montreal, Canada; the <sup>82</sup>Genome Quebec Innovation Centre, Montreal, Canada; the <sup>83</sup>Department of Metabolic Diseases, Heinrich Heine University Düsseldorf, Düsseldorf, Germany; the <sup>84</sup>Croatian Centre for Global Health, University of Split Medical School, Split, Croatia; the <sup>85</sup>Gerontology Research Center, National Institute on Aging, Baltimore, Maryland; <sup>86</sup>Leibniz-Institut für Arterioskleroseforschung an der Universität Münster, Universität Münster, Münster, Germany; the <sup>87</sup>General Medicine Division, Massachusetts General Hospital, Boston, Massachusetts; the <sup>88</sup>Departments of Medicine and Epidemiology, University of Washington, Seattle, Washington;

<sup>89</sup>Population Genomics, deCODE genetics, Reykjavik, Iceland; the <sup>90</sup>Faculty of Medicine, University of Iceland, Reykjavík, Iceland; <sup>91</sup>LIFE Study Centre, University of Leipzig, Leipzig, Germany; the <sup>92</sup>Medstar Research Institute, Baltimore, Maryland; the <sup>93</sup>Institute of Medical Informatics, Biometry and Epidemiology, Chair of Epidemiology, Ludwig-Maximilians-Universität, Munich, Germany; <sup>94</sup>Klinikum Grosshadern, Munich, Germany; the <sup>95</sup>Department of Neurology, Technische Universität München, München, Germany; the <sup>96</sup>Wellcome Trust Case Control Consortium; the <sup>97</sup>Center for Applied Genomics, Children's Hospital of Philadelphia, Philadelphia, Pennsylvania; the <sup>98</sup>Cardiovascular Research Center and Cardiology Division, Massachusetts General Hospital, Boston, Massachusetts; <sup>99</sup>Public Health and Primary Care, Clinical Gerontology Unit, University of Cambridge, Cambridge, U.K.; the <sup>100</sup>Pathology Division, Children's Hospital Boston, Boston, Massachusetts; <sup>101</sup>Genomic Medicine, Hammersmith Hospital, Imperial College London, London, U.K.; <sup>102</sup>Oxford NIHR Biomedical Research Centre, Churchill Hospital, Oxford, U.K.; and <sup>103</sup>Epidemiology and Medicine, Johns Hopkins University, Baltimore, Maryland.
